# Supplementary material
Source: publisher figshare collection journal article supplement (https://frontiersin.figshare.com/ndownloader/files/30978094)

**Figure S3.** Effect of lead compounds on live cell inhibition (determined by XTT) of *S. aureus* biofilms at 64  $\mu\text{g/ml}$  concentration.

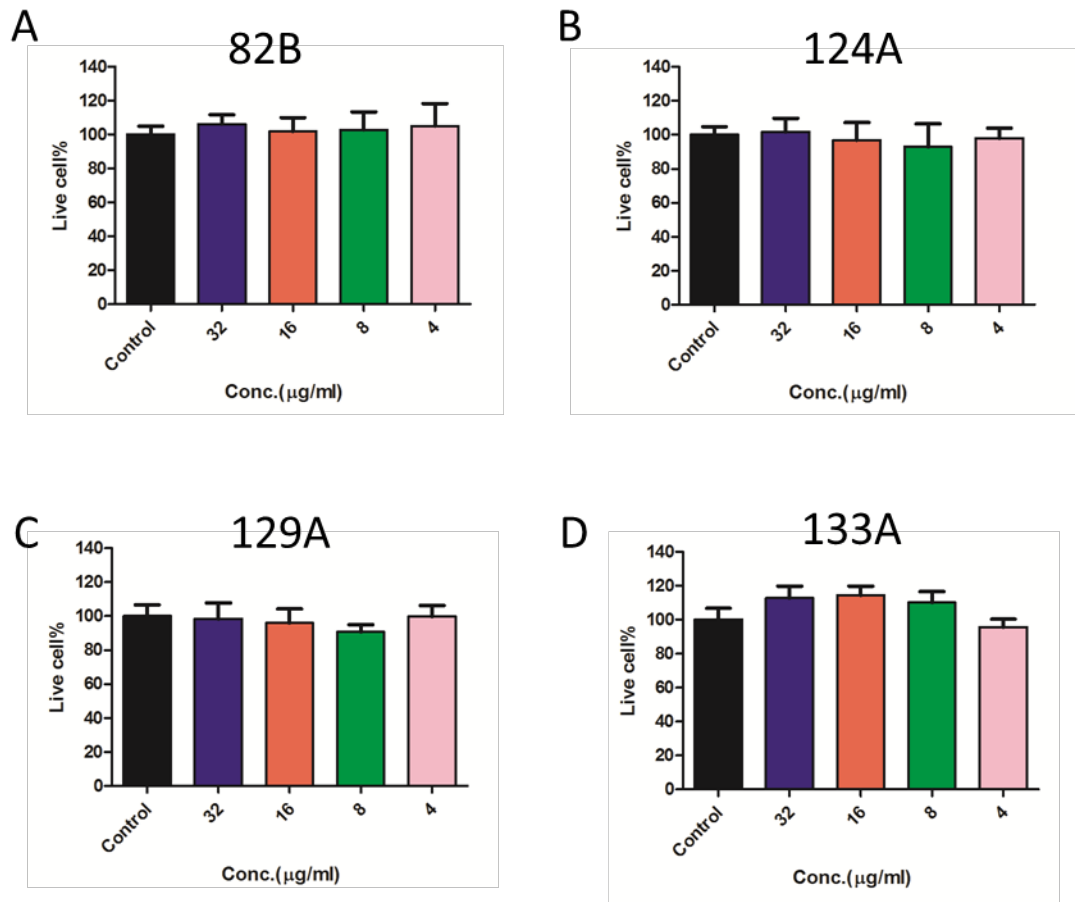

Supplement: Supplementary file [file 30978094]
